# Supplementary material for: Neutrophils drive accelerated tumor progression in the collagen-dense mammary tumor microenvironment
Source: Springer Nature journal article supplement (doi:10.1186/s13058-016-0703-7), 2016-05-11

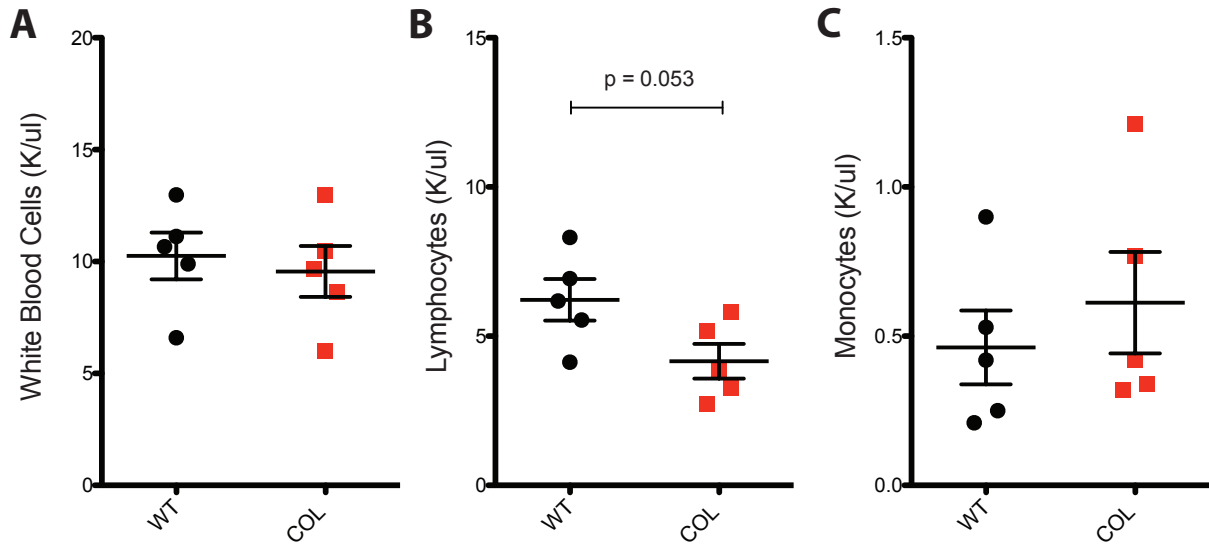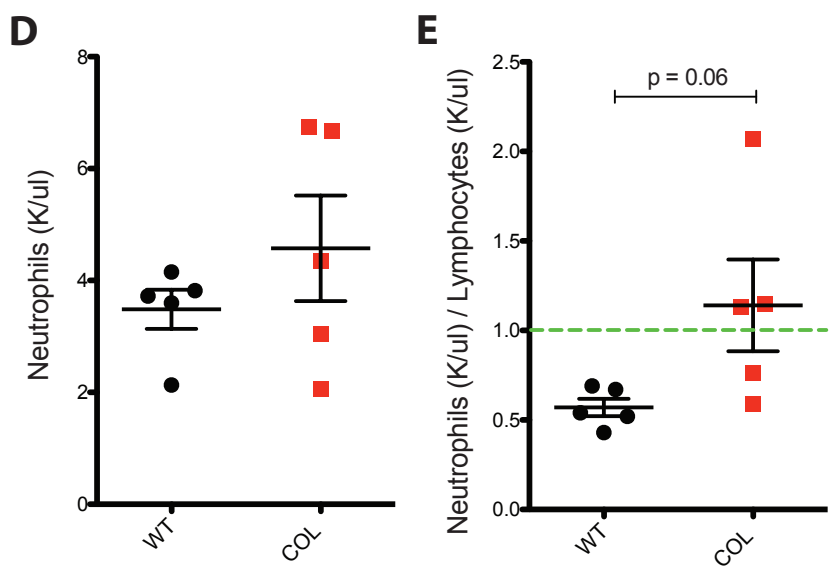

Supplement: MOESM2 [file 10111822]
