# Supplementary material for: Neutrophils drive accelerated tumor progression in the collagen-dense mammary tumor microenvironment
Source: Springer Nature journal article supplement (doi:10.1186/s13058-016-0703-7), 2016-05-11

### A Nkp46+ NK cells in Tumor

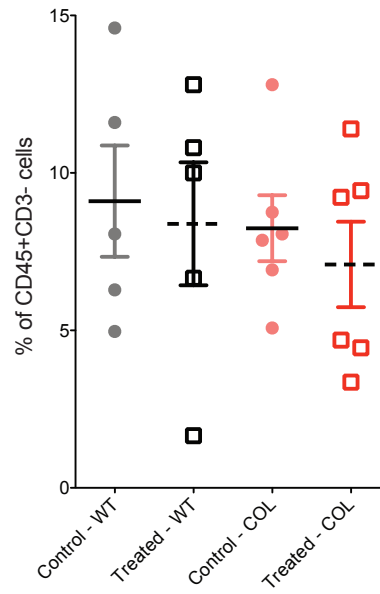

### B Normalized Spleen Weight

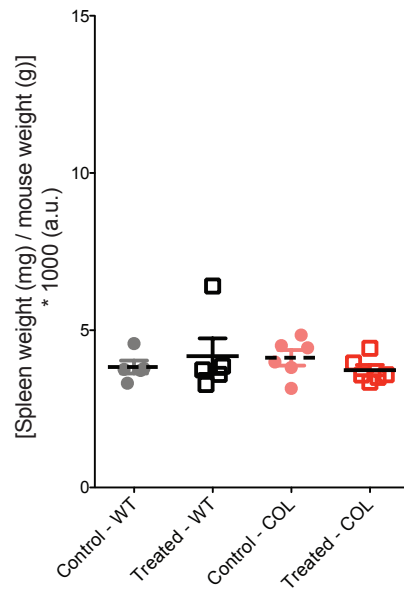

### C Nkp46+ NK cells in Spleen

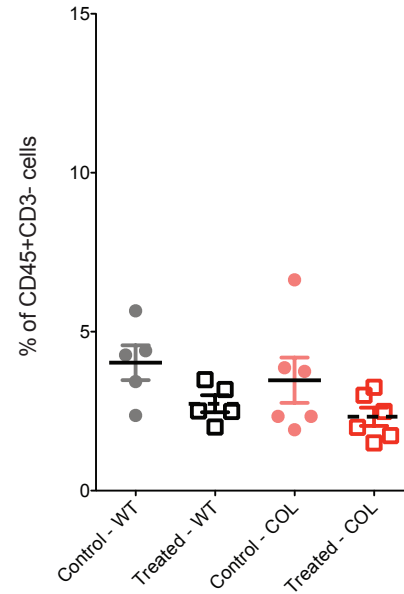

Supplement: MOESM6 [file 10111822]
